# Supplementary material for: Acidic residues in the membrane-proximal stalk region of vaccinia virus protein B5 are required for glycosaminoglycan-mediated disruption of the extracellular enveloped virus outer membrane
Source: PubMed Central journal article supplement (PMC2885056; doi:10.1099/vir.0.009092-0), 2009-07
Supplement: supp_90_7_1582__1.pdf [file supp_90_7_1582__1.pdf]

**Supplementary Table S1.** Primers used for construction of B5 mutants

Restriction enzyme sites are underlined. Amino acid substitutions are shown in bold type.

| Name | Sequence (5'–3')                                                                              |
|------|-----------------------------------------------------------------------------------------------|
| B5-1 | TGCT <u>CTAGAG</u> CACTAGTCTCGACGTATACG                                                       |
| B5-2 | CCC <u>AAGCTT</u> GGGCAACGCTTACAGAAACATCGC                                                    |
| B5-3 | GTACAACGTCTTTCGAGAGAGTTCGTACACATATTGG                                                         |
| B5-4 | CCAATATGTGTACGAACTCTCTCGAAAGACGTTGTAC                                                         |
| B5-5 | GTAAACGCCACTATGATTATTTTGCTCAAATCTGTCTC                                                        |
| B5-6 | GAGACAGATTTGAGCAAATAATCATAGTGGCGTTAAC                                                         |
| B5-A | GAAC <u>T</u> AACGCAGCATT <u>T</u> GTCTCCAGTGGCTGCTGGTCCCGCCGCTGCGACAGCTTTGAGCAA <u>A</u> CTC |
| B5-B | CAAAGCTGTCGCAGCGGCGGGACCAGCAGCCACTGGAGCAAATGCTGCGTTAGTTCGTACACATAT                            |
| B5-C | CTCGAAAGCCGTTGTACAATATGCACAAGCAATAGCATCGTTAGCAGCAACTTATCATATAATC                              |
| B5-D | AGTTGCTGCTAACGATGCTATTGCTTGTGCATATTGTACAACGGCTTTCGAGAGTTTGCTC                                 |
| B5-E | GTACAATATGAACAAGAAATAGAATCGTTAGCAGCAACTTATC                                                   |
| B5-F | GATAAGTTGCTGCTAACGATTCTATTTCTTGTTTCATATTGTAC                                                  |
| B5-G | GTACAATATGAACAAGAAATAGCATCGTTAGCAGCAACTTATC                                                   |
| B5-H | GATAAGTTGCTGCTAACGATGCTATTTCTTGTTTCATATTGTAC                                                  |
| B5-I | GTACAATATGAACAAGCAATAGCATCGTTAGCAGCAACTTATC                                                   |
| B5-J | GATAAGTTGCTGCTAACGATGCTATTGCTTGTTCATATTGTAC                                                   |
| B5-K | GTACAATATGCACAAGCAATAGCATCGTTAGCAGCAACTTATC                                                   |
| B5-L | GATAAGTTGCTGCTAACGATGCTATTGCTTGTGCATATTGTAC                                                   |
| B5-M | GTACAATATGCACAAGCAATAGAATCGTTAGAAGCAACTTATC                                                   |
| B5-N | GATAAGTTGCTTCTAACGATTCTATTGCTTGTGCATATTGTAC                                                   |
